# Supplementary material
Source: PubMed Central journal article supplement (PMC1449646)

**A**

```
SB outer      ..CAGTTGAAGTCGGAAGTTTACATACTTAGG..
SB inner      ..CAGTGG--GTCAGAAGTTTACATACTAAGT..
Human chr.15  ..TTGGAATGAGTTGAAGTTTACATACTTAGG..
Human chr.8   ..TAGGCAAATATGGAAGTTTATATACTTAAG..
```

**B**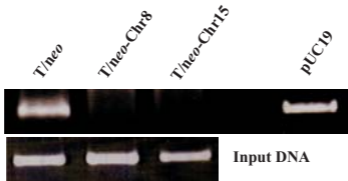

Supplement: pnas_0507683103_2.pdf [file pnas_0507683103_2.pdf]
